# Supplementary material for: Beyond fur color: differences in socio-emotional behavior and the oxytocin system between male BL6 and CD1 mice in adolescence and adulthood
Source: PubMed Central journal article supplement (PMC11663876; doi:10.3389/fnins.2024.1493619), 2024-12-09
Supplement: Table_1.pdf [file Table_1.pdf]

**SUPPLEMENTARY TABLES**

**Table S1: Statistics of the behavioral differences of BL6 and CD1 mice on EPM, OFT and SPAT corresponding to Figure 1.** Factor time represents non-social vs social stimulus presentations during SPAT; factor strain represents BL6 vs CD1 effects; factor age represents adolescent vs adult effects.

| EPM                                  |                                                                                                    | Two-way ANOVA     | Figure 1B-D                         |
|--------------------------------------|----------------------------------------------------------------------------------------------------|-------------------|-------------------------------------|
| Open arm entries [%]                 | (Age) $F_{1,36} = 1.494$<br>(Strain) $F_{1,36} = 42.663$<br>(Age x Strain) $F_{1,36} = 0.634$      |                   | P = 0.230<br>P < 0.001<br>P = 0.431 |
| Time open arm [%]                    | (Age) $F_{1,36} = 9.968$<br>(Strain) $F_{1,36} = 19.092$<br>(Age x strain) $F_{1,36} = 7.081$      |                   | P = 0.003<br>P < 0.001<br>P = 0.012 |
| Closed arm entries [n]               | (Age) $F_{1,36} = 1.750$<br>(Strain) $F_{1,36} = 16.680$<br>(Age x strain) $F_{1,36} = 0.744$      |                   | P = 0.194<br>P < 0.001<br>P = 0.394 |
| OFT                                  |                                                                                                    | Two-way ANOVA     | Figure 1E-F                         |
| Time center zone [s]                 | (Age) $F_{1,48} = 832.871$<br>(Strain) $F_{1,48} = 601.201$<br>(Age x strain) $F_{1,48} = 715.951$ |                   | P < 0.001<br>P < 0.001<br>P < 0.001 |
| Distance travelled [m]               | (Age) $F_{1,48} = 2.227$<br>(Strain) $F_{1,48} = 8.673$<br>(Age x strain) $F_{1,48} = 6.817$       |                   | P = 0.142<br>P = 0.005<br>P = 0.012 |
| SPAT – Strain effects                |                                                                                                    | Mixed Model ANOVA | Figure 1G                           |
| Investigation time [%]<br>Adolescent | (Time) $F_{1,18} = 44.306$<br>(Strain) $F_{1,18} = 11.667$<br>(Time x strain) $F_{1,18} = 15.096$  |                   | P < 0.001<br>P = 0.003<br>P = 0.001 |
| Investigation time [%]<br>Adult      | (Time) $F_{1,33} = 31.561$<br>(Strain) $F_{1,33} = 35.630$<br>(Time x strain) $F_{1,33} = 4.819$   |                   | P < 0.001<br>P < 0.001<br>P = 0.035 |
| SPAT – Age effects                   |                                                                                                    | Mixed Model ANOVA | Figure 1G                           |
| Investigation time [%]<br>BL6        | (Time) $F_{1,26} = 8.709$<br>(Age) $F_{1,26} = 3.243$<br>(Time x age) $F_{1,26} = 0.052$           |                   | P = 0.007<br>P = 0.083<br>P = 0.822 |
| Investigation time [%]<br>CD1        | (Time) $F_{1,25} = 72.416$<br>(Age) $F_{1,25} = 0.579$<br>(Time x age) $F_{1,25} = 2.249$          |                   | P < 0.001<br>P = 0.454<br>P = 0.146 |

**Table S2: Statistics of the behavioral differences of BL6 and CD1 mice during CFC corresponding to Figure 2.** Factor time represents CS-US pairings during acquisition and CS presentations during extinction; factor strain represents BL6 vs CD1 effects; factor age represents adolescent vs adult effects.

| Adolescent CFC – Strain effects |  | Mixed Model ANOVA, Independent T-Test                                                                             | Figure 3B-D                               |
|---------------------------------|--|-------------------------------------------------------------------------------------------------------------------|-------------------------------------------|
| Acquisition                     |  | (Time) $F_{3,54} = 24.111$<br>(Strain) $F_{1,18} = 29.033$<br>(Time x strain) $F_{3,54} = 6.722$                  | $P < 0.001$<br>$P < 0.001$<br>$P = 0.001$ |
| Extinction                      |  | (Time) $F_{4,958,89.245} = 5.195$<br>(Strain) $F_{1,18} = 110.649$<br>(Time x strain) $F_{4,958,89.245} = 3.603$  | $P < 0.001$<br>$P < 0.001$<br>$P = 0.005$ |
| Recall                          |  | $T_{18} = 0.7973$                                                                                                 | $P < 0.001$                               |
| Adult CFC – Strain effects      |  | Mixed Model ANOVA, Independent T-Test                                                                             | Figure 3E-G                               |
| Acquisition                     |  | (Time) $F_{1.672,30.096} = 20.073$<br>(Strain) $F_{1,18} = 37.197$<br>(Time x strain) $F_{1.672,30.096} = 10.235$ | $P < 0.001$<br>$P < 0.001$<br>$P < 0.001$ |
| Extinction                      |  | (Time) $F_{4.974,89.532} = 3.518$<br>(Strain) $F_{1,18} = 116.962$<br>(Time x strain) $F_{4.974,89.532} = 0.616$  | $P = 0.006$<br>$P < 0.001$<br>$P = 0.687$ |
| Recall                          |  | $T_{18} = 11.732$                                                                                                 | $P < 0.001$                               |
| BL6 CFC – Age effects           |  | Mixed Model ANOVA, Independent T-Test                                                                             | Figure 3B-G                               |
| Acquisition                     |  | (Time) $F_{3,54} = 38.955$<br>(Age) $F_{1,18} = 1.817$<br>(Time x age) $F_{3,54} = 0.431$                         | $P < 0.001$<br>$P = 0.194$<br>$P = 0.732$ |
| Extinction                      |  | (Time) $F_{9,162} = 5.405$<br>(Age) $F_{1,18} = 1.889$<br>(Time x age) $F_{9,162} = 1.237$                        | $P < 0.001$<br>$P = 0.186$<br>$P = 0.276$ |
| Recall                          |  | $T_{18} = -1.019$                                                                                                 | $P = 0.322$                               |
| CD1 CFC – Age effects           |  | Mixed Model ANOVA, Independent T-Test                                                                             | Figure 3B-G                               |
| Acquisition                     |  | (Time) $F_{1.981,35.652} = 8.095$<br>(Age) $F_{1,18} = 0.083$<br>(Time x age) $F_{1.981,35.652} = 1.873$          | $P = 0.001$<br>$P = 0.777$<br>$P = 0.169$ |
| Extinction                      |  | (Time) $F_{4.530,81.544} = 5.539$<br>(Age) $F_{1,18} = 0.477$<br>(Time x age) $F_{4.530,81.544} = 0.478$          | $P < 0.001$<br>$P = 0.499$<br>$P = 0.775$ |
| Recall                          |  | $T_{18} = 1.410$                                                                                                  | $P = 0.176$                               |

**Table S3: Statistics of the behavioral differences of BL6 and CD1 mice during SFC corresponding to Figure 3.** Factor time represents repeated stimuli presentations during extinction and recall; factor strain represents BL6 vs CD1 effects; factor age represents adolescent vs adult effects.

| Adolescent SFC – Strain effects                                             |                                                            | Mann-Whitney-U Test, Mixed Model ANOVA                    | Figure 4B-D      |
|-----------------------------------------------------------------------------|------------------------------------------------------------|-----------------------------------------------------------|------------------|
| Acquisition<br>Extinction non-social<br><br>Extinction social<br><br>Recall |                                                            | U = 52.5, z = -1.82                                       | P = 0.101        |
|                                                                             |                                                            | (Time) $F_{1.838,80.868} = 47.271$                        | P < 0.001        |
|                                                                             |                                                            | (Strain) $F_{1,44} = 25.353$                              | P < 0.001        |
|                                                                             |                                                            | (Conditioning) $F_{1,44} = 0.535$                         | P = 0.468        |
|                                                                             |                                                            | (Time x strain) $F_{1.838,80.868} = 7.816$                | P = 0.001        |
|                                                                             |                                                            | (Time x conditioning) $F_{1.838,80.868} = 0.344$          | P = 0.692        |
|                                                                             |                                                            | (Strain x conditioning) $F_{1,44} = 1.817$                | P = 0.185        |
|                                                                             |                                                            | (Time x strain x conditioning) $F_{1.838,80.868} = 0.628$ | P = 0.523        |
|                                                                             |                                                            | (Time) $F_{3.415,146.853} = 6.307$                        | P < 0.001        |
|                                                                             |                                                            | (Strain) $F_{1,43} = 23.264$                              | P < 0.001        |
|                                                                             |                                                            | (Conditioning) $F_{1,43} = 33.193$                        | P < 0.001        |
|                                                                             |                                                            | (Time x strain) $F_{3.415,146.853} = 0.843$               | P = 0.485        |
|                                                                             | (Time x conditioning) $F_{3.415,146.853} = 1.985$          | P = 0.110                                                 |                  |
|                                                                             | (Strain x conditioning) $F_{1,43} = 0.119$                 | P = 0.731                                                 |                  |
|                                                                             | (Time x strain x conditioning) $F_{3.415,146.853} = 1.091$ | P = 0.359                                                 |                  |
|                                                                             | (Time) $F_{3.039,133.728} = 6.592$                         | P < 0.001                                                 |                  |
|                                                                             | (Strain) $F_{1,44} = 5.141$                                | P = 0.028                                                 |                  |
|                                                                             | (Conditioning) $F_{1,44} = 6.949$                          | P = 0.012                                                 |                  |
|                                                                             | (Time x strain) $F_{3.039,133.728} = 1.844$                | P = 0.142                                                 |                  |
|                                                                             | (Time x conditioning) $F_{3.039,133.728} = 1.315$          | P = 0.272                                                 |                  |
|                                                                             | (Strain x conditioning) $F_{1,44} = 0.364$                 | P = 0.550                                                 |                  |
|                                                                             | (Time x strain x conditioning) $F_{3.039,133.728} = 1.222$ | P = 0.304                                                 |                  |
| Adult SFC – Strain effects                                                  |                                                            | Mann-Whitney-U Test, Mixed Model ANOVA                    | Figure 4E-G      |
| Acquisition<br>Extinction non-social<br><br>Extinction social<br><br>Recall |                                                            | U = 86, z = -2.43                                         | P = 0.027        |
|                                                                             |                                                            | (Time) $F_{1.801,97.257} = 38.036$                        | P < 0.001        |
|                                                                             |                                                            | (Strain) $F_{1,54} = 1.501$                               | P = 0.226        |
|                                                                             |                                                            | (Conditioning) $F_{1,54} = 1.295$                         | P = 0.260        |
|                                                                             |                                                            | (Time x strain) $F_{1.801,97.257} = 0.192$                | P = 0.803        |
|                                                                             |                                                            | (Time x conditioning) $F_{1.801,97.257} = 0.985$          | P = 0.370        |
|                                                                             |                                                            | (Strain x conditioning) $F_{1,54} = 0.811$                | P = 0.372        |
|                                                                             |                                                            | (Time x strain x conditioning) $F_{1.801,97.257} = 0.010$ | P = 0.985        |
|                                                                             |                                                            | (Time) $F_{2.559,138.175} = 11.195$                       | P < 0.001        |
|                                                                             |                                                            | (Strain) $F_{1,54} = 42.055$                              | P < 0.001        |
|                                                                             |                                                            | (Conditioning) $F_{1,54} = 36.297$                        | P < 0.001        |
|                                                                             |                                                            | (Time x strain) $F_{2.559,138.175} = 9.928$               | P < 0.001        |
|                                                                             | (Time x conditioning) $F_{2.559,138.175} = 8.691$          | P < 0.001                                                 |                  |
|                                                                             | (Strain x conditioning) $F_{1,54} = 9.343$                 | P = 0.003                                                 |                  |
|                                                                             | (Time x strain x conditioning) $F_{2.559,138.175} = 1.725$ | P = 0.173                                                 |                  |
|                                                                             | (Time) $F_{2.561,135.742} = 5.178$                         | P = 0.003                                                 |                  |
|                                                                             | (Strain) $F_{1,53} = 40.507$                               | P < 0.001                                                 |                  |
|                                                                             | (Conditioning) $F_{1,53} = 7.240$                          | P = 0.010                                                 |                  |
|                                                                             | (Time x strain) $F_{2.561,135.742} = 2.997$                | P = 0.041                                                 |                  |
|                                                                             | (Time x conditioning) $F_{2.561,135.742} = 3.323$          | P = 0.028                                                 |                  |
|                                                                             | (Strain x conditioning) $F_{1,53} = 32.397$                | P < 0.001                                                 |                  |
|                                                                             | (Time x strain x conditioning) $F_{2.561,135.742} = 1.365$ | P = 0.258                                                 |                  |
| SFC – Strain and age effects                                                |                                                            | Two-way ANOVA                                             | Figure 4B, E     |
| Acquisition                                                                 | (Age) $F_{1,57} = 6.639$                                   | P = 0.013                                                 |                  |
|                                                                             | (Strain) $F_{1,57} = 6.928$                                | P = 0.011                                                 |                  |
|                                                                             | (Age x strain) $F_{1,57} = 0.403$                          | P = 0.528                                                 |                  |
| BL6 SFC – Age effects                                                       |                                                            | Two-way ANOVA, Mixed Model ANOVA                          | Figure 4C-D, F-G |
| Extinction non-social                                                       | (Time) $F_{1.676,85.487} = 30.230$                         | P < 0.001                                                 |                  |
|                                                                             | (Age) $F_{1,51} = 4.596$                                   | P = 0.037                                                 |                  |
|                                                                             | (Conditioning) $F_{1,51} = 1.937$                          | P = 0.170                                                 |                  |
|                                                                             | (Time x age) $F_{1.676,85.487} = 0.628$                    | P = 0.509                                                 |                  |

|                                        |                                                                                                                                                                                                                                                                                                                                                                                                                                                                    |                                                                                                                                |
|----------------------------------------|--------------------------------------------------------------------------------------------------------------------------------------------------------------------------------------------------------------------------------------------------------------------------------------------------------------------------------------------------------------------------------------------------------------------------------------------------------------------|--------------------------------------------------------------------------------------------------------------------------------|
| Extinction social                      | (Time x conditioning) $F_{1.676,85.487} = 0.499$<br>(Age x conditioning) $F_{1,51} = 0.853$<br>(Time x age x conditioning) $F_{1.676,85.487} = 0.048$<br>(Time) $F_{2.910,148.434} = 2.126$<br>(Age) $F_{1,51} = 537$<br>(Conditioning) $F_{1,51} = 61.535$<br>(Time x age) $F_{2.910,148.434} = 1.662$<br>(Time x conditioning) $F_{2.910,148.434} = 3.356$<br>(Age x conditioning) $F_{1,51} = 0.358$<br>(Time x age x conditioning) $F_{2.910,148.434} = 0.867$ | P = 0.576<br>P = 0.360<br>P = 0.929<br>P = 0.101<br>P = 0.467<br>P < 0.001<br>P = 0.179<br>P = 0.022<br>P = 0.552<br>P = 0.457 |
| Recall                                 | (Time) $F_{2.608,132.988} = 5.134$<br>(Age) $F_{1,51} = 2.847$<br>(Conditioning) $F_{1,51} = 23.144$<br>(Time x age) $F_{2.608,132.988} = 3.076$<br>(Time x conditioning) $F_{2.608,132.988} = 3.270$<br>(Age x conditioning) $F_{1,51} = 1.582$<br>(Time x age x conditioning) $F_{2.608,132.988} = 0.723$                                                                                                                                                        | P = 0.003<br>P = 0.098<br>P < 0.001<br>P = 0.036<br>P = 0.029<br>P = 0.214<br>P = 0.522                                        |
| CD1 SFC – Age effects                  |                                                                                                                                                                                                                                                                                                                                                                                                                                                                    |                                                                                                                                |
| Mann-Whitney-U Test, Mixed Model ANOVA |                                                                                                                                                                                                                                                                                                                                                                                                                                                                    |                                                                                                                                |
| Figure 4C-D, F-G                       |                                                                                                                                                                                                                                                                                                                                                                                                                                                                    |                                                                                                                                |
| Extinction non-social                  | (Time) $F_{1.884,88.536} = 55.155$<br>(Age) $F_{1,47} = 0.083$<br>(Conditioning) $F_{1,47} = 0.420$<br>(Time x age) $F_{1.884,88.536} = 3.873$<br>(Time x conditioning) $F_{1.884,88.536} = 0.437$<br>(Age x conditioning) $F_{1,47} = 0.837$<br>(Time x age x conditioning) $F_{1.884,88.536} = 0.848$                                                                                                                                                            | P < 0.001<br>P = 0.775<br>P = 0.520<br>P = 0.027<br>P = 0.636<br>P = 0.365<br>P = 0.426                                        |
| Extinction social                      | (Time) $F_{3.041,139.899} = 18.632$<br>(Age) $F_{1,46} = 0.890$<br>(Conditioning) $F_{1,46} = 17.378$<br>(Time x age) $F_{3.041,139.899} = 1.251$<br>(Time x conditioning) $F_{3.041,139.899} = 6.648$<br>(Age x conditioning) $F_{1,46} = 2.769$<br>(Time x age x conditioning) $F_{3.041,139.899} = 0.876$                                                                                                                                                       | P < 0.001<br>P = 0.350<br>P < 0.001<br>P = 0.294<br>P < 0.001<br>P = 0.103<br>P = 0.457                                        |
| Recall                                 | (Time) $F_{2.840,130.632} = 7.362$<br>(Age) $F_{1,46} = 0.319$<br>(conditioning) $F_{1,46} = 0.00$<br>(Time x age) $F_{2.840,130.632} = 0.921$<br>(Time x conditioning) $F_{2.840,130.632} = 2.760$<br>(Age x conditioning) $F_{1,46} = 8.224$<br>(Time x age x conditioning) $F_{2.840,130.632} = 0.381$                                                                                                                                                          | P < 0.001<br>P = 0.575<br>P = 0.970<br>P = 0.429<br>P = 0.048<br>P = 0.006<br>P = 0.756                                        |

**Table S4: Statistics of responses to foot shocks of increasing intensities of adult and adolescent BL6 and CD1 mice using FSSC corresponding to Figure 4.** Factor intensity represents foot shocks at increasing intensities during FSIT; factor strain represents BL6 vs CD1 effects; factor age represents adolescent vs adult effects.

| FSSC              | Mixed Model ANOVA                                                                                                                                                                                                                                                                                                                                             | Figure 2B-D                                                                                                          |
|-------------------|---------------------------------------------------------------------------------------------------------------------------------------------------------------------------------------------------------------------------------------------------------------------------------------------------------------------------------------------------------------|----------------------------------------------------------------------------------------------------------------------|
| Response to shock | (Intensity) $F_{2.543,50.864} = 91.580$<br>(Age) $F_{1,20} = 13.065$<br>(Strain) $F_{1,20} = 36.290$<br>(Intensity x age) $F_{2.543,50.864} = 2.884$<br>(Intensity x strain) $F_{2.543,50.864} = 5.899$<br>(Age x strain) $F_{1,20} = 7.903$<br>(Intensity x age x strain) $F_{2.543,50.864} = 3.812$                                                         | $P < 0.001$<br>$P = 0.002$<br>$P < 0.001$<br>$P = 0.053$<br>$P = 0.003$<br>$P = 0.011$<br>$P = 0.020$                |
| Response score    | (Intensity) $F_{4.342,86.845} = 128.615$<br>(Age) $F_{1,20} = 4.515$<br>(Strain) $F_{1,20} = 3.457$<br>(Intensity x age) $F_{4.342,86.845} = 0.782$<br>(Intensity x strain) $F_{4.342,86.845} = 3.884$<br>(Age x strain) $F_{1,20} = 0.018$                                                                                                                   | $P < 0.001$<br>$P = 0.046$<br>$P = 0.078$<br>$P = 0.550$<br>$P = 0.005$<br>$P = 0.896$                               |
| Vocalization      | (Intensity x age x strain) $F_{4.342,86.845} = 3.523$<br>(Intensity) $F_{4.293,85.861} = 52.948$<br>(Age) $F_{1,20} = 3.451$<br>(Strain) $F_{1,20} = 37.254$<br>(Intensity x age) $F_{4.293,85.861} = 0.553$<br>(Intensity x strain) $F_{4.293,85.861} = 7.958$<br>(Age x strain) $F_{1,20} = 3.451$<br>(Intensity x age x strain) $F_{4.293,85.861} = 1.841$ | $P = 0.009$<br>$P < 0.001$<br>$P = 0.078$<br>$P < 0.001$<br>$P = 0.709$<br>$P < 0.001$<br>$P = 0.078$<br>$P = 0.124$ |

**Table S5: Statistics of the molecular differences of adult BL6 and CD1 mice on the OXT system using RAR and IHC corresponding to Figure 5.** Factor age presentations adolescent vs adult effects; factor strain represents BL6 vs CD1 effects.

| RAR | Two-way ANOVA                                                                                  | Figure 5A                                 |
|-----|------------------------------------------------------------------------------------------------|-------------------------------------------|
| VMH | (Age) $F_{1,24} = 28.316$<br>(Strain) $F_{1,24} = 1.946$<br>(Age x strain) $F_{1,24} = 2.907$  | $P < 0.001$<br>$P = 0.176$<br>$P = 0.101$ |
| PAG | (Age) $F_{1,23} = 11.369$<br>(Strain) $F_{1,23} = 10.689$<br>(Age x strain) $F_{1,23} = 0.009$ | $P = 0.003$<br>$P = 0.003$<br>$P = 0.924$ |
| dLS | (Age) $F_{1,24} = 0.055$<br>(Strain) $F_{1,24} = 16.307$<br>(Age x strain) $F_{1,24} = 8.295$  | $P = 0.817$<br>$P < 0.001$<br>$P = 0.008$ |
| vLS | (Age) $F_{1,24} = 2.213$<br>(Strain) $F_{1,24} = 3.545$<br>(Age x strain) $F_{1,24} = 3.144$   | $P = 0.150$<br>$P = 0.072$<br>$P = 0.089$ |
| CeA | (Age) $F_{1,23} = 5.155$<br>(Strain) $F_{1,23} = 2.503$<br>(Age x strain) $F_{1,23} = 0.114$   | $P = 0.033$<br>$P = 0.127$<br>$P = 0.739$ |
| BLA | (Age) $F_{1,24} = 29.961$<br>(Strain) $F_{1,24} = 0.035$<br>(Age x strain) $F_{1,24} = 1.516$  | $P < 0.001$<br>$P = 0.853$<br>$P = 0.230$ |
| IHC | Two-way ANOVA                                                                                  | Figure 5C                                 |
| PVN | (Age) $F_{1,15} = 2.631$<br>(Strain) $F_{1,15} = 0.158$<br>(Age x strain) $F_{1,15} = 0.025$   | $P = 0.126$<br>$P = 0.697$<br>$P = 0.877$ |
| SON | (Age) $F_{1,16} = 0.182$<br>(Strain) $F_{1,16} = 0.975$<br>(Age x strain) $F_{1,16} = 0.033$   | $P = 0.675$<br>$P = 0.338$<br>$P = 0.858$ |

**Table S6: Statistics of the behavioral differences of adult BL6 and CD1 mice following icv OXT injection on the EPM and SPAT corresponding to Figure 6.** Factor strain represents BL6 vs CD1 effects; factor treatment represents Veh vs OXT<sub>LD</sub> vs OXT<sub>HD</sub> effects.

| EPM                                  |                                                                                                        | One-way ANOVA | Figure 6B-D                         |
|--------------------------------------|--------------------------------------------------------------------------------------------------------|---------------|-------------------------------------|
| Open arm entries [%]                 | (BL6) $F_{2,33} = 0.070$<br>(CD1) $F_{2,33} = 0.767$                                                   |               | P = 0.933<br>P = 0.472              |
| Time open arm [%]                    | (BL6) $F_{2,33} = 2.83$<br>(CD1) $F_{2,33} = 1.528$                                                    |               | P = 0.073<br>P = 0.232              |
| Closed arm entries [n]               | (BL6) $F_{2,33} = 3.59$<br>(CD1) $F_{2,33} = 2.50$                                                     |               | P = 0.039<br>P = 0.098              |
| SPAT                                 |                                                                                                        | Two-way ANOVA | Figure 6E                           |
| Investigation time [%]<br>Non-social | (Strain) $F_{1,71} = 43.9$<br>(Treatment) $F_{2,71} = 5.72$<br>(Strain x treatment) $F_{2,71} = 0.886$ |               | P < 0.001<br>P = 0.005<br>P = 0.417 |
| Investigation time [%]<br>Social     | (Strain) $F_{1,71} = 39.4$<br>(Treatment) $F_{2,71} = 2.13$<br>(Strain x treatment) $F_{2,71} = 0.451$ |               | P < 0.001<br>P = 0.126<br>P = 0.639 |

**Table S7: Statistics of thermal pain perception using HPT and bodyweight between adult and adolescent BL6 and CD1 mice corresponding to Supplementary Figure S1.** Factor strain represents BL6 vs CD1 effects; factor age represents adolescent vs adult effects.

| FSSC day 2                              |                                                                                                                                                                                                                                                                                                                                                               | Mixed Model ANOVA                  | Figure S1A-C                                                                                         |
|-----------------------------------------|---------------------------------------------------------------------------------------------------------------------------------------------------------------------------------------------------------------------------------------------------------------------------------------------------------------------------------------------------------------|------------------------------------|------------------------------------------------------------------------------------------------------|
| Response to shock                       | (Intensity) $F_{3,888,77.753} = 36.184$<br>(Age) $F_{1,20} = 0.656$<br>(Strain) $F_{1,20} = 4.098$<br>(Intensity x age) $F_{3,888,77.753} = 0.848$<br>(Intensity x strain) $F_{3,888,77.753} = 1.237$<br>(Age x strain) $F_{1,20} = 0.164$<br>(Intensity x age x strain) $F_{3,888,77.753} = 0.671$                                                           |                                    | P < 0.001<br>P = 0.428<br>P = 0.056<br>P = 0.496<br>P = 0.302<br>P = 0.690<br>P = 0.610              |
| Response score                          | (Intensity) $F_{4,364,87.281} = 66.559$<br>(Age) $F_{1,20} =$<br>(Strain) $F_{1,20} =$<br>(Intensity x age) $F_{4,364,87.281} = 0.622$<br>(Intensity x strain) $F_{4,364,87.281} = 0.265$<br>(Age x strain) $F_{1,20} =$                                                                                                                                      |                                    | P < 0.001<br>P = 0.950<br>P = 0.573<br>P = 0.662<br>P = 0.265<br>P = 0.950                           |
| Vocalization                            | (Intensity x age x strain) $F_{4,364,87.281} = 0.259$<br>(Intensity) $F_{3,615,72.300} = 28.194$<br>(Age) $F_{1,20} = 0.016$<br>(Strain) $F_{1,20} = 10.246$<br>(Intensity x age) $F_{3,615,72.300} = 0.741$<br>(Intensity x strain) $F_{3,615,72.300} = 2.007$<br>(Age x strain) $F_{1,20} = 0.410$<br>(Intensity x age x strain) $F_{3,615,72.300} = 1.029$ |                                    | P = 0.916<br>P < 0.001<br>P = 0.899<br>P = 0.004<br>P = 0.554<br>P = 0.109<br>P = 0.529<br>P = 0.394 |
| HPT                                     |                                                                                                                                                                                                                                                                                                                                                               | Two-way ANOVA, pearson correlation | Figure S1D-E                                                                                         |
| Paw withdrawal latency [sec]            | (Age) $F_{1,19} = 29.395$<br>(Strain) $F_{1,19} = 1.315$<br>(Age x Strain) $F_{1,19} = 6.284$                                                                                                                                                                                                                                                                 |                                    | P < 0.001<br>P = 0.266<br>P = 0.021                                                                  |
| Correlation paw withdrawal - bodyweight | $r = 0.517, n = 23$                                                                                                                                                                                                                                                                                                                                           |                                    | P = 0.011                                                                                            |
| Bodyweight                              |                                                                                                                                                                                                                                                                                                                                                               | Two-way ANOVA                      | Figure S1F                                                                                           |
| FSSC [g]                                | (Age) $F_{1,20} = 116.727$<br>(Strain) $F_{1,20} = 90.835$<br>(Age x Strain) $F_{1,20} = 176.243$                                                                                                                                                                                                                                                             |                                    | P < 0.001<br>P < 0.001<br>P < 0.001                                                                  |
| HPT [g]                                 | (Age) $F_{1,20} = 29.395$<br>(Strain) $F_{1,20} = 146.398$<br>(Age x Strain) $F_{1,20} = 41.056$                                                                                                                                                                                                                                                              |                                    | P < 0.001<br>P < 0.001<br>P < 0.001                                                                  |
| FSSC - bodyweight                       |                                                                                                                                                                                                                                                                                                                                                               | Pearson correlation                | Not illustrated                                                                                      |

|        |                         |             |
|--------|-------------------------|-------------|
| 0.05mA | no responses            |             |
| 0.1mA  | $r = -0.215$ , $n = 24$ | $P = 0.314$ |
| 0.15mA | $r = -0.269$ , $n = 24$ | $P = 0.204$ |
| 0.2mA  | $r = -0.253$ , $n = 24$ | $P = 0.232$ |
| 0.3mA  | $r = 0.005$ , $n = 24$  | $P = 0.982$ |
| 0.5mA  | $r = 0.304$ , $n = 24$  | $P = 0.148$ |
| 0.7mA  | $r = 0.267$ , $n = 24$  | $P = 0.207$ |
| 1.0mA  | $r = 0.152$ , $n = 24$  | $P = 0.479$ |

**Table S8: Statistics of the behavioral differences of adult BL6 mice following icv OXT injection during SFC extinction training corresponding to Supplementary Figure S2.** Factor time represents repeated stimuli presentations during extinction and recall; factor treatment represents Veh vs OXT<sub>LD</sub> effects; factor SFC represents SFC<sup>-</sup> vs SFC<sup>+</sup> effects.

| SFC                                           | Mann-Whitney-U Test, Mixed Model ANOVA        | Figure S2                         |             |
|-----------------------------------------------|-----------------------------------------------|-----------------------------------|-------------|
| Acquisition                                   | $U = 29$ , $z = -0.812$                       | $P = 0.541$                       |             |
| Extinction non-social                         | (Time) $F_{1,490,43,200} = 8.512$             | $P = 0.002$                       |             |
|                                               | (OXT) $F_{1,29} = 4.715$                      | $P = 0.038$                       |             |
|                                               | (SFC) $F_{1,29} = 0.082$                      | $P = 0.777$                       |             |
|                                               | (Time x OXT) $F_{1,490,43,200} = 1.003$       | $P = 0.354$                       |             |
|                                               | (Time x SFC) $F_{1,490,43,200} = 0.049$       | $P = 0.910$                       |             |
|                                               | (OXT x SFC) $F_{1,29} = 0.188$                | $P = 0.668$                       |             |
|                                               | (Time x OXT x SFC) $F_{1,490,43,200} = 0.040$ | $P = 0.922$                       |             |
|                                               | Extinction social                             | (Time) $F_{2,168,62,880} = 1.909$ | $P = 0.153$ |
|                                               |                                               | (OXT) $F_{1,29} = 1.492$          | $P = 0.232$ |
|                                               |                                               | (SFC) $F_{1,29} = 18.249$         | $P < 0.001$ |
| (Time x OXT) $F_{2,168,62,880} = 0.733$       |                                               | $P = 0.495$                       |             |
| (Time x SFC) $F_{2,168,62,880} = 0.701$       |                                               | $P = 0.511$                       |             |
| (OXT x SFC) $F_{1,29} = 0.316$                |                                               | $P = 0.578$                       |             |
| (Time x OXT x SFC) $F_{2,168,62,880} = 1.250$ |                                               | $P = 0.295$                       |             |
| Recall                                        |                                               | (Time) $F_{2,168,62,880} = 1.909$ | $P = 0.153$ |
|                                               |                                               | (OXT) $F_{1,29} = 1.492$          | $P = 0.232$ |
|                                               |                                               | (SFC) $F_{1,29} = 18.249$         | $P < 0.001$ |
|                                               | (Time x OXT) $F_{2,168,62,880} = 0.733$       | $P = 0.495$                       |             |
|                                               | (Time x SFC) $F_{2,168,62,880} = 0.701$       | $P = 0.511$                       |             |
|                                               | (OXT x SFC) $F_{1,29} = 0.316$                | $P = 0.578$                       |             |
|                                               | (Time x OXT x SFC) $F_{2,168,62,880} = 1.250$ | $P = 0.295$                       |             |
